# Supplementary material for: Global estimates on the number of people blind or visually impaired by age-related macular degeneration: a meta-analysis from 2000 to 2020
Source: Springer Nature journal article supplement (doi:10.1038/s41433-024-03050-z), 2024-07-04

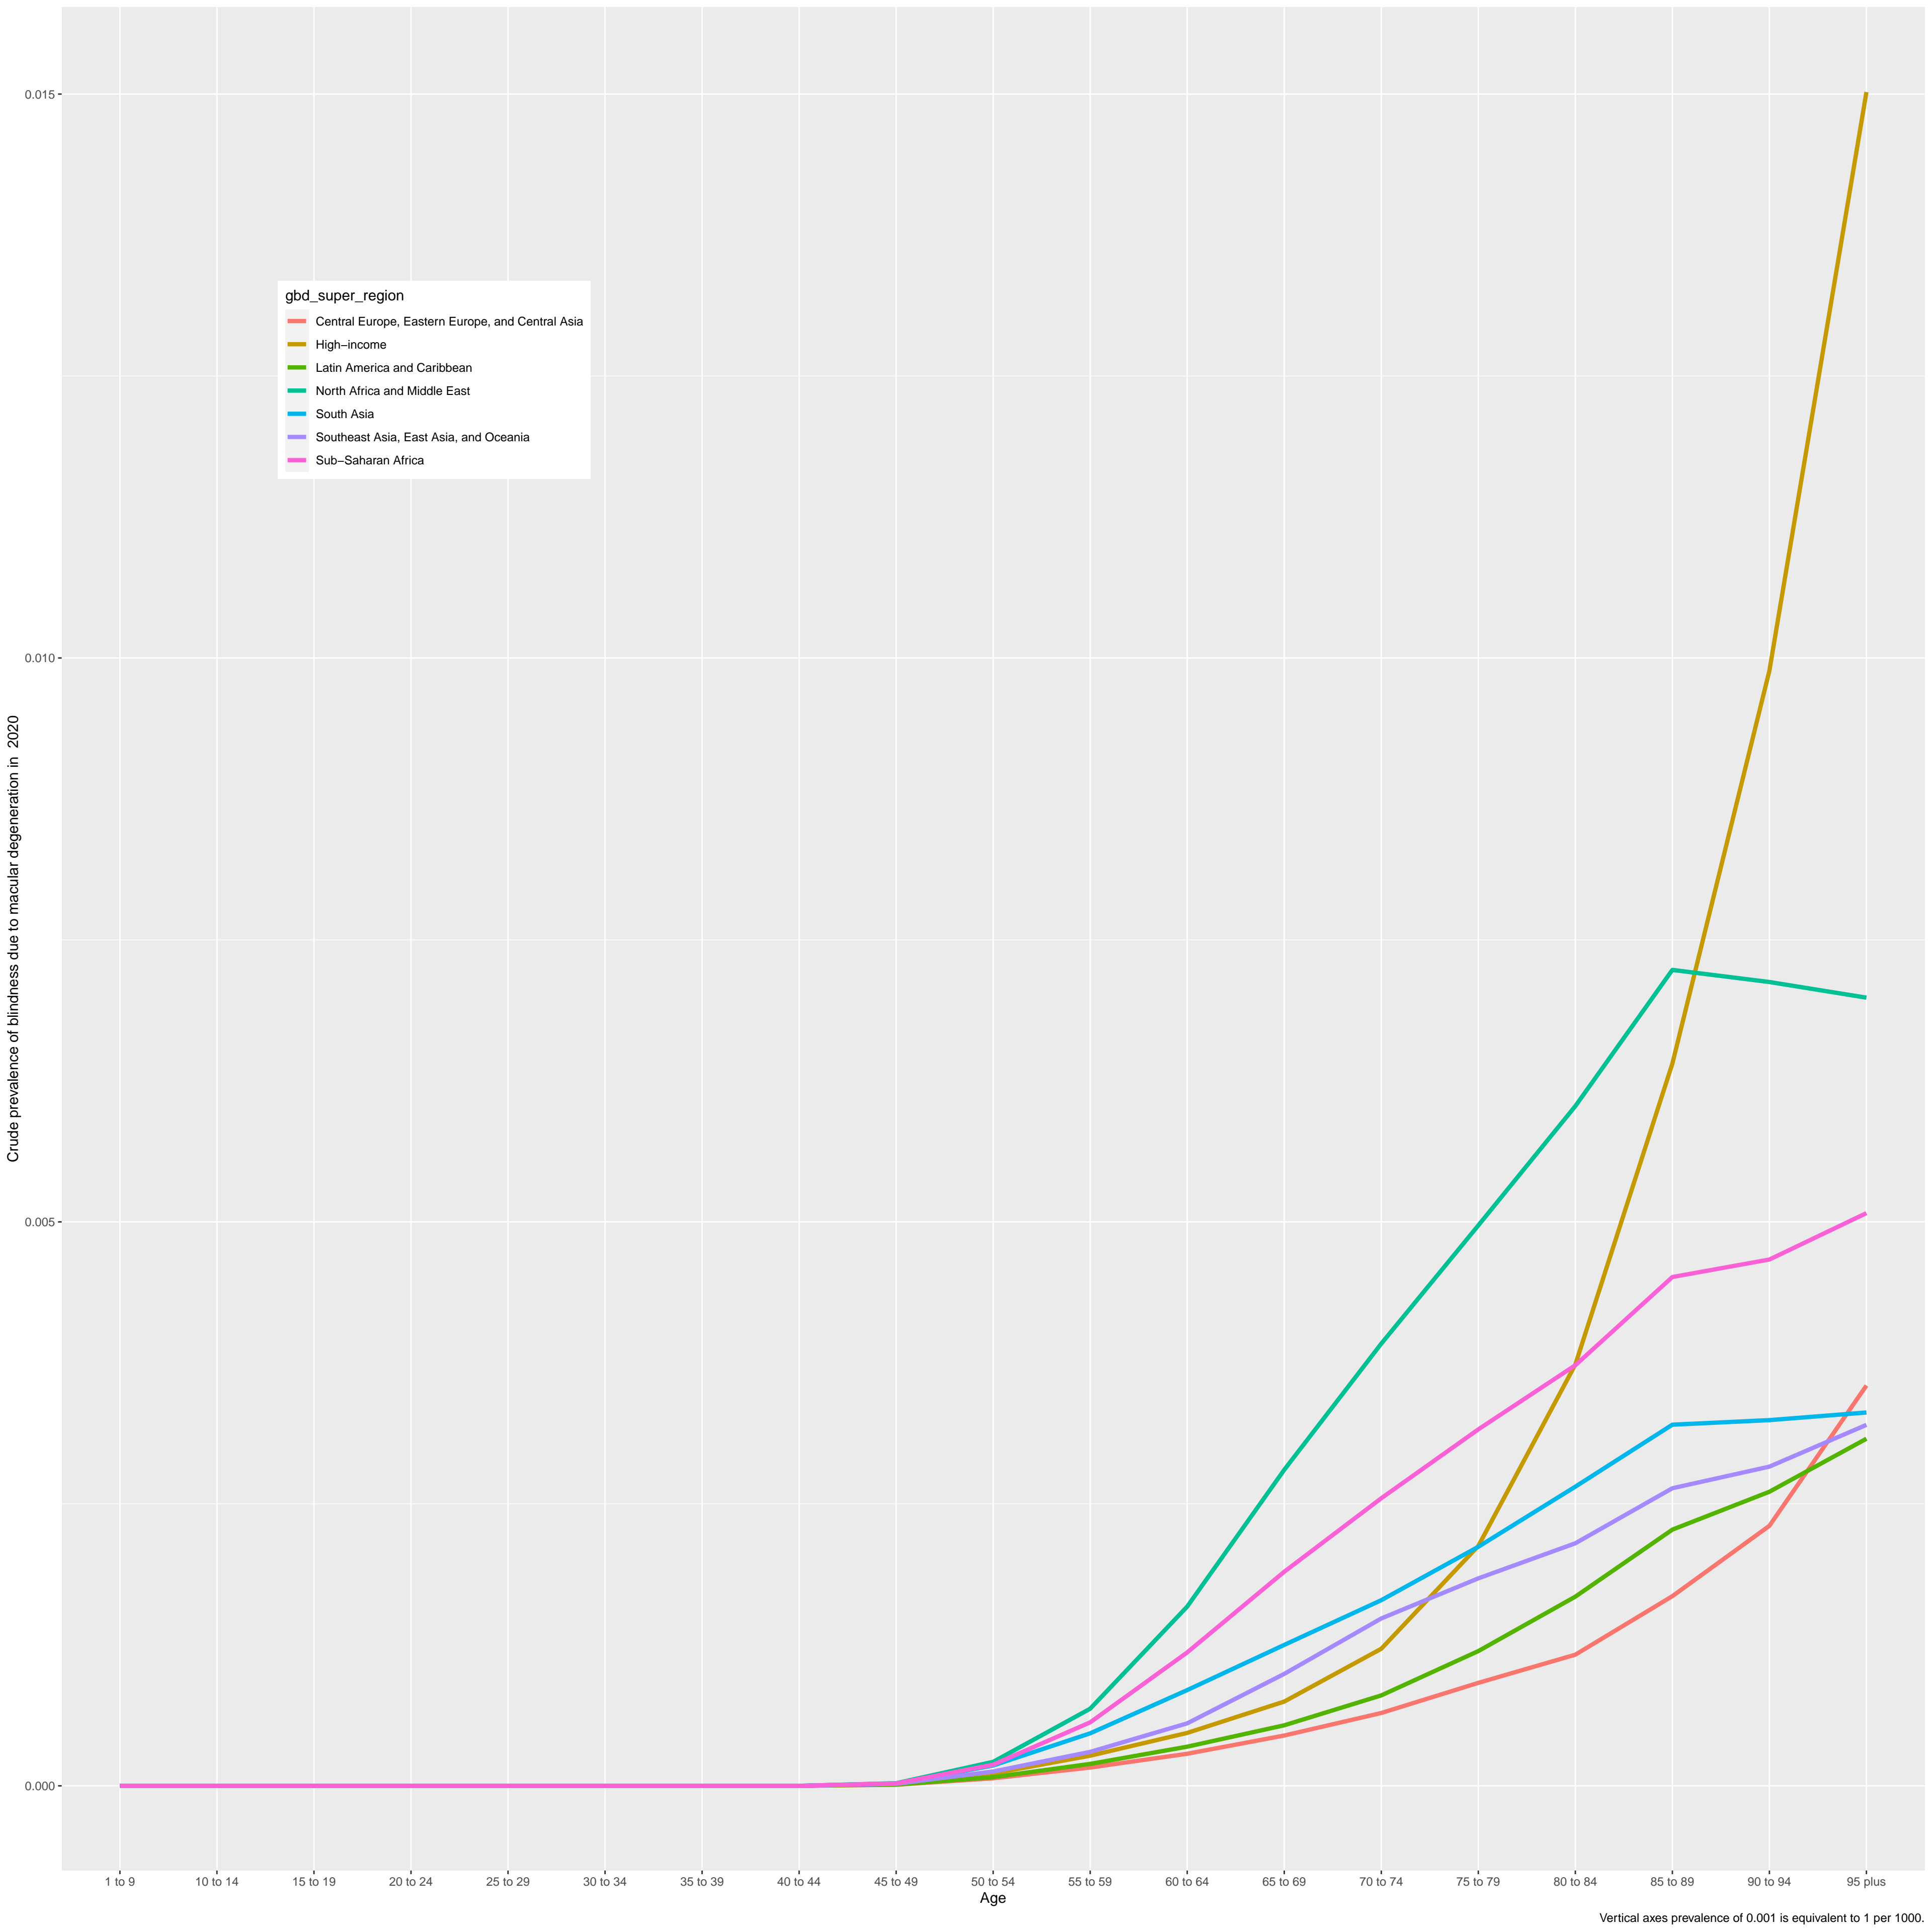

Supplement: MOESM1 [file 41433_2024_3050_MOESM1_ESM.pdf]
